# Supplementary material for: Genome-Wide Identification of PRP Genes in Apple Genome and the Role of MdPRP6 in Response to Heat Stress
Source: MDPI journal article supplement (doi:10.3390/ijms22115942), 2021-05-31

Supplemental Table 1. Application of primers and sequences

| Primer Name   | Purpose/Vector      | Sequence (5'-3')                                                                                             |
|---------------|---------------------|--------------------------------------------------------------------------------------------------------------|
| <i>MdPRP1</i> | Clone/pMD19T-simple | F: ATGGACTTTAGGTGTTTC<br>R: TTAAGCACAGACAAAGC                                                                |
| <i>MdPRP2</i> |                     | F: ATGGCTTCTCTAAGGCAGTTG<br>R: TTAGGTGCAATGGAAGCCTT                                                          |
| <i>MdPRP3</i> |                     | F: ATGTGCTTCCTAGGGTTTT<br>R: TCAATCAGGAGGAGGACT                                                              |
| <i>MdPRP4</i> |                     | F: ATGAATTCCAAAACATCTTC<br>R: TTATGCACATTTGAAGCCCT                                                           |
| <i>MdPRP5</i> |                     | F: ATGGCATCCAAAACGAC<br>R: TTAGGCACACTGGAAACC                                                                |
| <i>MdPRP6</i> |                     | F: ATGCCTTCTACCAAGCAGCTCTC<br>R: TCATTACATTTGAAGCCAGGAGG                                                     |
| <i>MdPRP7</i> |                     | F: ATGGATTCCAAAAGTTCTTC<br>R: TTATGCACATTTGAAGCC                                                             |
| <i>MdPRP8</i> |                     | F: ATGGCATCCAAAACAACCTC<br>R: TTAGGCACATTGGAAACC                                                             |
| <i>MdPRP9</i> |                     | F: ATGGCGGAATCCAGCAA<br>R: CTAGAGAGAGCAAGTGTAAACC                                                            |
| <i>MdPRP1</i> | PGWB405/415         | F: GGGGACAAGTTTGTACAAAAAAGCAGGCTTCATGGACTTTAGGTGTTTC<br>R: GGGGACCACTTTGTACAAGAAAGCTGGGTTAGCACAGACAAAGC      |
| <i>MdPRP2</i> |                     | F: GGGGACAAGTTTGTACAAAAAAGCAGGCTTCATGGCTTCTCTAAGGCAG<br>R: GGGGACCACTTTGTACAAGAAAGCTGGGTTGGTCAATGGAAGCCTT    |
| <i>MdPRP3</i> |                     | F: GGGGACAAGTTTGTACAAAAAAGCAGGCTTCATGTGCTTCCTAGGGTTTT<br>R: GGGGACCACTTTGTACAAGAAAGCTGGGTTCATCAGGAGGAGGACT   |
| <i>MdPRP4</i> |                     | F: GGGGACAAGTTTGTACAAAAAAGCAGGCTTCATGAATTCCAAAACATCTT<br>R: GGGGACCACTTTGTACAAGAAAGCTGGGTTGCACATTTGAAGCCCT   |
| <i>MdPRP5</i> |                     | F: GGGGACAAGTTTGTACAAAAAAGCAGGCTTCATGGCATCCAAAACGAC<br>R: GGGGACCACTTTGTACAAGAAAGCTGGGTTGGCACACTGGAAACC      |
| <i>MdPRP6</i> |                     | F: GGGGACAAGTTTGTACAAAAAAGCAGGCTTCATGCCTTCTACCAAGCAG<br>R: GGGGACCACTTTGTACAAGAAAGCTGGGTTTTCACATTTGAAGCCAGGA |
| <i>MdPRP7</i> |                     | F: GGGGACAAGTTTGTACAAAAAAGCAGGCTTCATGGATTCCAAAAGTTCTT<br>R: GGGGACCACTTTGTACAAGAAAGCTGGGTTTGCACATTTGAAGCC    |
| <i>MdPRP8</i> |                     | F: GGGGACAAGTTTGTACAAAAAAGCAGGCTTCATGGCATCCAAAACAAC<br>R: GGGGACCACTTTGTACAAGAAAGCTGGGTTGGCACATTGGAAACC      |
| <i>MdPRP9</i> |                     | F: GGGGACAAGTTTGTACAAAAAAGCAGGCTTCATGGCGGAATCCAGCAA<br>R: GGGGACCACTTTGTACAAGAAAGCTGGGTTGAGAGAGCAAGTGTAAACC  |
| <i>MdHB-7</i> | PGWB455             | F: GGGGACAAGTTTGTACAAAAAAGCAGGCTTCATGCTCGATAAAATCGAAT<br>R: GGGGACCACTTTGTACAAGAAAGCTGGGTTGAGACCAGAAGTCCCACC |
| 35S           |                     | GCTCCTACAAATGCCATCA                                                                                          |

|                  |                |                             |
|------------------|----------------|-----------------------------|
| <i>MdPRP1</i>    | <b>qRT-PCR</b> | F: CCTTCCCCGCTCCCTCTATTC    |
|                  |                | R: CCCTAACCAACTCCCACAAACACC |
| <i>MdPRP2</i>    |                | F: GTAGCCTCGTTGGTGGACTTGC   |
|                  |                | R: GGAAGCCTTTCGGGATAGACTTG  |
| <i>MdPRP3</i>    |                | F: GCCAAAGCACAAAGCCTGTAAACC |
|                  |                | R: TTACGATGGGAGGACTGTGACTG  |
| <i>MdPRP4</i>    |                | F: CCCACCAGATCACCCCTTGTT    |
|                  |                | R: CTCGGGGACATTCTTCGCAC     |
| <i>MdPRP5</i>    |                | F: GCCCTTGTCAGTTCTTGTGG     |
|                  |                | R: AGCAAGGTTCTACGGGAGGT     |
| <i>MdPRP6</i>    |                | F: CGCTAGGGCTCAACATGGAA     |
|                  |                | R: TTTGAAGCCAGGAGGGACTG     |
| <i>MdPRP7</i>    |                | F: CACCCTTGTTGTGCTTTGCT     |
|                  |                | R: ATTTGAAGCCCGAAGGGACAT    |
| <i>MdPRP8</i>    |                | F: CAAAGCCAAATCCGACGCCA     |
|                  |                | R: CAGCGAGCCCTTGATGAGA      |
| <i>MdPRP9</i>    |                | F: GCAAGCCAAAGCACAAAGCCTATG |
|                  |                | R: GTGGTTTGACAATGGGAGGGACTG |
| <i>MDH</i>       |                | F: ATTCAAGTATGCCTGGGTGC     |
|                  |                | R: CAGTCAGCCTGTGATGTCC      |
| <i>Ubiquitin</i> |                | F: GGTGTTTCCAGTGGCGGACG     |
|                  |                | R: TCCTCCCCTCAGCTACGGGGTAT  |

Supplemental Table 2. Conserved motifs in the MdPRP proteins

| Motif | Width | E-value   | Logo |
|-------|-------|-----------|------|
| 1     | 35    | 16.7e-216 |      |
| 2     | 21    | 2.9e-098  |      |

3 15 6.7e-051

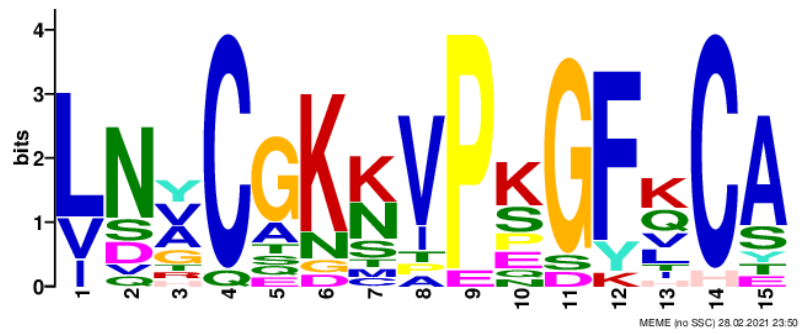

4 21 4.4e-045

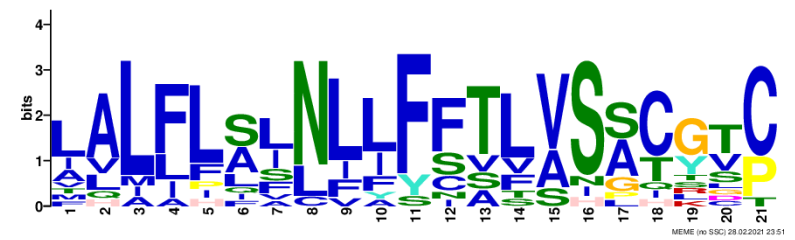

5 11 4.6e-022

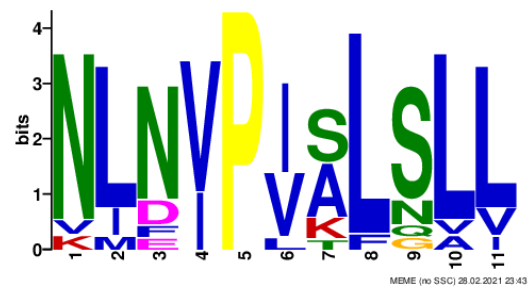

Supplemental Figure. 1. PCR identification and relative expression analysis of *MdPRP* in transgenic *tobacco*

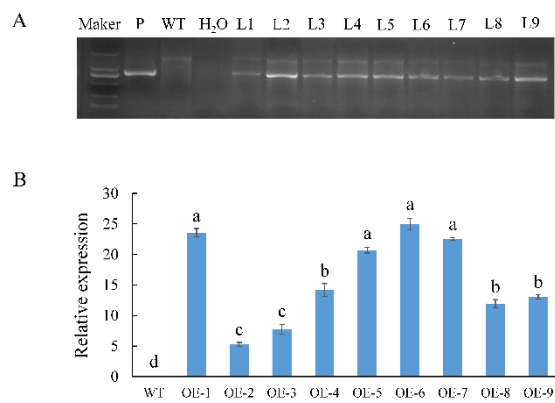

Supplement: s1 [file s1]
